1 **Noise in a metabolic pathway leads to persister formation in *Mycobacterium tuberculosis***

2 Jeffrey Quigley, Kim Lewis\*

3 Antimicrobial Discovery Center, Department of Biology, Northeastern University, Boston, MA,

4 USA

5 \*Corresponding author: Kim Lewis, [k.lewis@northeastern.edu](mailto:k.lewis@northeastern.edu)

6 **Abstract**

7 Tuberculosis is difficult to treat due to dormant cells in hypoxic granulomas, and stochastically-  
8 formed persisters tolerant of antibiotics. Bactericidal antibiotics kill by corrupting their energy-  
9 dependent targets. We reasoned that noise in the expression of an energy-generating  
10 component will produce rare persister cells. In sorted low ATP *M. tuberculosis* grown on acetate  
11 there is considerable cell-to-cell variation in the level of mRNA coding for AckA, the acetate  
12 kinase. Quenching the noise by overexpressing *ackA* sharply decreases persisters, showing  
13 that it acts as the main persister gene under these conditions. This demonstrates that a low  
14 energy mechanism is responsible for the formation of *M. tuberculosis* persisters and suggests  
15 that the mechanism of their antibiotic tolerance is similar to that of dormant cells in a granuloma.  
16 Entrance into a low energy state driven by stochastic variation in expression of energy-  
17 producing enzymes is likely a general mechanism by which bacteria produce persisters.

18 **Introduction**

19 Tuberculosis is the most important infectious disease caused by a bacterial pathogen and is  
20 responsible for killing 1.4 million people a year (WHO, 2019). This ongoing global epidemic  
21 stems from the difficulty of eradicating the pathogen with currently available antibiotics.  
22 Treatment of antibiotic-susceptible *M. tuberculosis* requires 6 months with a combination of  
23 rifampicin, isoniazid, ethambutol, and pyrazinamide (Zumla, Nahid, & Cole, 2013). Not  
24 surprisingly, this results in side effects and poor compliance. The need for a lengthy treatment is  
25 attributed to the presence of dormant, non-replicating *M. tuberculosis* cells that are tolerant of

26 killing by antibiotics (Datta et al., 2016; Sacchetti, Rubin, & Freundlich, 2008; Sonnenkalb et  
27 al., 2021).

28

29 The disease is typically associated with the walling off of *M. tuberculosis* in a hypoxic, acidified  
30 granuloma, a complex structure made primarily of immune cells and their products (Guirado &  
31 Schlesinger, 2013). These various stressors induce a population-wide low metabolic state  
32 termed dormancy. DosR and PhoP regulators control entrance of cells into a non-replicative  
33 state under hypoxia and acid stress (Baker, Johnson, & Abramovitch, 2014; Leistikow et al.,  
34 2010; Namugenyi, Aagesen, Elliott, & Tischler, 2017; Zheng et al., 2017), and RelA mediates  
35 starvation-induced non-replication (Dutta et al., 2019; Primm et al., 2000). Regardless of the  
36 stress, induction of dormancy is characterized by a metabolic downshift in the population and  
37 increased antibiotic tolerance (Boldrin, Provvedi, Cioetto Mazzabo, Segafreddo, & Manganeli,  
38 2020; Gengenbacher, Rao, Pethe, & Dick, 2010; Wayne & Hayes, 1996). *M. tuberculosis*  
39 incapable of this metabolic downshift are more susceptible to antibiotics *in vivo* (Baek, Li, &  
40 Sasseti, 2011).

41

42 Apart from this population-wide response to distinct stress factors, *M. tuberculosis* also forms a  
43 small subpopulation of persister cells that are produced stochastically during normal growth and  
44 are tolerant of killing by antibiotics (Jain et al., 2016; I. Keren, Minami, Rubin, & Lewis, 2011;  
45 Srinivas, Arrieta-Ortiz, Kaur, Peterson, & Baliga, 2020; Torrey, Keren, Via, Lee, & Lewis, 2016).  
46 Persisters were originally discovered by Joseph Bigger in a population of *S. aureus* in 1944  
47 (Bigger, 1944), and decades later they are attracting increased interest due to their role in  
48 recalcitrance of chronic diseases to antibiotic therapy (Lewis & Manuse, 2019). Tolerance is  
49 likely based on a shared feature of bactericidal antibiotics - killing by corrupting their targets (Iris  
50 Keren, Kaldalu, Spoering, Wang, & Lewis, 2004). For example, aminoglycosides such as  
51 streptomycin cause mistranslation, which leads to the production of toxic misfolded peptides

52 (Davis, Chen, & Tai, 1986). Based on this, we suggested that persisters are low-energy cells  
53 (Brian P. Conlon et al., 2016). Indeed, persisters in *S. aureus* and *E. coli* have low levels of ATP  
54 (Brian P. Conlon et al., 2016; Manuse et al., 2021; Zalis et al., 2019). Sorting of cells treated  
55 with antibiotics with low levels of expression of TCA cycle enzymes enriches in persisters in  
56 these two species. However, the relative input of these enzymes into persister formation is  
57 unknown and detecting both expression of an energy producing component and ATP in the  
58 same cell has not been achieved yet. The mechanism by which multi-drug tolerant *M.*  
59 *tuberculosis* persisters are formed is largely unknown. Given that both population-wide  
60 dormancy of cells, and persisters that can form during growth exhibit antibiotic tolerance,  
61 understanding the mechanism of *M. tuberculosis* persister formation is critical for developing  
62 more effective therapies to treat this important disease.

63  
64 Here, using single cell analysis, we demonstrate that *M. tuberculosis* persisters are  
65 stochastically generated low ATP cells. It is this low energy state that renders them tolerant of  
66 antibiotics. Further, using direct measurement of ATP and transcription noise in metabolic  
67 enzymes in the same cell, we explore the mechanistic basis of persister formation in *M.*  
68 *tuberculosis*. We show that, in a simple growth medium with acetate, low ATP cells express low  
69 levels of the acetate kinase AckA. By quenching noise through overexpression of AckA we are  
70 able to dramatically reduce the level of persisters, indicating that AckA functions as the main  
71 persister gene under these conditions. The approaches described in this study provide a means  
72 to determine the relative contribution of any gene into persister formation. Stochastic entrance  
73 into a low ATP state is likely a general mechanism of persister formation in bacteria.

## 74 **Results**

### 75 **Low levels of ATP are linked to antibiotic tolerance in *M. tuberculosis***

76 In order to examine a causal link between a low energy state and persister formation in *M.*  
77 *tuberculosis*, we took advantage of the antibiotic bedaquiline that specifically inhibits the

78 mycobacterial F<sub>1</sub>F<sub>0</sub> ATP synthase by binding to its C-subunit (Andries et al., 2005). Adding  
79 bedaquiline to a growing culture reduced the level of ATP 2-fold after a relatively short, 4 hour  
80 exposure, as detected with luciferase (Figure 1A). In order to measure the level of persisters in  
81 these cells, cultures were washed to remove bedaquiline, challenged with either rifampicin +  
82 streptomycin (Rif/Strep) or isoniazid (INH) for 7 days, and viability was determined by colony  
83 count. Pre-treatment with bedaquiline significantly increased the number of antibiotic tolerant  
84 persister cells when challenged with either Rif/Strep or INH (Figure 1B). Rifampicin inhibits RNA  
85 polymerase, streptomycin causes mistranslation of the ribosome, and INH is a prodrug that  
86 forms and adduct with NAD, which inhibits the synthesis of mycolic acid of the mycobacterial  
87 cell wall. Tolerance of these mechanistically unrelated antibiotics shows that a decrease in ATP  
88 causes multidrug tolerance. A longer, three day treatment with bedaquiline kills *M. tuberculosis*  
89 (Koul et al., 2014), apparently lowering the concentration of ATP to a point of no return.

90 However, the ability of bedaquiline to cause multidrug tolerance of the pathogen is a potential  
91 cause for concern and should be taken into account when developing treatment regimens.

92

93 In order to analyze ATP in single cells, we employed ATeam1.03<sup>YEMK</sup>, a biosensor recently  
94 developed for use in mycobacteria (Maglica, Ozdemir, & McKinney, 2015). ATeam1.03<sup>YEMK</sup> is a  
95 FRET based sensor comprising a pair of cyan and yellow fluorescent proteins (CFP and YFP)  
96 flanking the epsilon subunit of the *Bacillus subtilis* F<sub>0</sub>F<sub>1</sub> ATP synthase, which binds ATP with  
97 high affinity and specificity (Maglica et al., 2015). Binding of ATP by the epsilon subunit brings  
98 CFP in close proximity to YFP resulting in energy transfer between the fluorescent proteins. To  
99 determine ATP, FRET fluorescence is monitored using a setting optimized for excitation of CFP  
100 and emission of YFP (Figure 1C). CFP is excited at 435 nm and emission is monitored at 527  
101 nm (YFP), CFP<sub>ex</sub>→YFP<sub>em</sub>. FRET based energy transfer from CFP to YFP is dependent on ATP  
102 concentration. The FRET values are normalized to fluorescence measurement of YFP by  
103 excitation at 488nm and collecting emission at 527nm, YFP<sub>ex</sub>→YFP<sub>em</sub>, which is not dependent

104 on ATP concentration. This allows for normalization of cell-to-cell variation in the levels of the  
105 reporter. Normalized values are displayed as FRET/YFP and are indicative of intracellular ATP  
106 concentration. ATP was monitored in single cells of a growing culture expressing  
107 ATeam1.03<sup>YEMK</sup> by FACS. Of note is the broad distribution of ATP levels among cells of the  
108 population (Figure 1D). Treatment with bedaquiline produces a distinct shift to lower levels of  
109 ATP (Figure 1D, E, F). Next, we compared ATP levels in single cells of growing and stationary  
110 cultures. As expected, ATP levels are higher in a growing population (Figure 1G, H). The level  
111 of persisters surviving treatment with Rif/Strep was 50 fold higher in the stationary population as  
112 compared to growing cells (Figure 1I), in agreement with previous findings (I. Keren et al.,  
113 2011).

114

115 We took advantage of a higher level of persisters in the stationary population to directly examine  
116 the relationship between ATP and survival in single cells using cell sorting. A gate  
117 corresponding to 2% of the population was set to sort 5,000 low or high ATP cells (Figure 2A)  
118 directly into a medium with antibiotic, and survival was monitored for 72 hours. Additionally,  
119 5,000 cells were sorted irrespective of the ATP state of the cell (YFP only) and were considered  
120 representative of the behavior of the bulk culture. The gate was set for low ATP cells with good  
121 expression of the sensor (high YFP signal) in order to improve detection and avoid defective  
122 cells. Low ATP cells were considerably more tolerant of rifampicin (Figure 2B) or streptomycin  
123 (Figure 2C) as compared to high ATP cells or to the bulk of the population. High ATP and  
124 regular cells were essentially eliminated by rifampicin by 48 hours, while a distinct population of  
125 low ATP cells survived at 72 hours. A similar pattern was observed with a more rapidly killing  
126 streptomycin. This experiment shows that low ATP cells produced stochastically are multidrug-  
127 tolerant persisters.

128 **Identifying noise generators**

129 Noise in the level of expression of any one among numerous enzymes participating in energy  
130 production could lead to low ATP we observe in rare single cells. In order to identify such “noisy”  
131 components, we used a simple growth medium, where the number of enzymes contributing to  
132 energy production is minimized. *M. tuberculosis* grows well in a minimal medium with acetate as  
133 a single carbon source, with a doubling time of ~21 hours, similar to its doubling time in rich  
134 media (18-20 hours). *M. tuberculosis* use two short metabolic pathways that lead from acetate  
135 to acetyl-CoA which then enters into the TCA cycle (Figure 3A). Acetate can either be converted  
136 to acetyl-CoA in a single step by acetyl-coenzyme A synthase Acs, or in a two-step pathway  
137 consisting of acetate kinase AckA producing acetyl phosphate, and the phosphotransacetylase  
138 Pta. We reasoned that consequences of an enzyme being expressed at low levels will be more  
139 apparent if the substrate is not saturating the pathway. To this end, we first tested growth of *M.*  
140 *tuberculosis* at different concentrations of acetate, aiming to identify a minimal level at which  
141 growth is not affected. Growth rate was similar in the presence of 20, 10 and 5 mM of acetate,  
142 and dropped at 2.5 mM acetate (Figure 3B). The level of ATP dropped in the order 20 – 10 – 5  
143 mM acetate (Figure 3C, D), showing that growth is not affected by relatively small changes in  
144 ATP. We observed a similar trend with lactate as a single carbon source (Figure S1 A, B, C).  
145 We next analyzed the distribution variance of ATP among cells of these three populations in  
146 order to determine the relative noise in its levels (Figure 3E). For this, the coefficient of variation  
147 (CV) was derived from the FRET/YFP distributions generated via single cell FACS analysis  
148 (Figure 3C). CV quantifies variance by dividing the standard deviation ( $\sigma$ ) of FRET/YFP ratio of  
149 cells in a population by mean ( $\mu$ ) FRET/YFP ratio of the population ( $\sigma/\mu$ ). Noise in ATP levels  
150 among cells decreased in the order 5 – 10 – 20 mM acetate (Figure 3E, F). Again, we observed  
151 a similar phenotype in a medium with lactate (Figure S1D, E). This suggested that more  
152 persisters will form in a medium with lower acetate or lactate. Indeed, a population growing in 5  
153 mM acetate, or 10mM lactate, produced about 10 fold more persisters as compared to cells in a  
154 20 mM sample (Figure 3G, Figure S1F). Survival is negatively correlated with median ATP of

155 the population (Figure 3H) and positively correlated with noise in ATP level (Figure 3I). Notably,  
156 apart from linking noise to persister formation, this experiment shows that growth rate per se  
157 does not determine tolerance.

158

159 We then used single cell reverse transcription quantitative PCR (RT-qPCR) recently developed  
160 for mycobacteria (Srinivas et al., 2020) to directly link noise in ATP concentration to the level of  
161 expression of enzymes in the acetate metabolic pathways. For this, we used cells growing at a  
162 sub-optimal level of acetate (2.5 mM) in order to maximize possible cell-to-cell differences in  
163 ATP. Twelve individual low and high ATP cells were sorted into a microtiter plate and transcripts  
164 of the acetate metabolism genes *acs*, *ackA*, and *pta* were measured by RT-qPCR. The low ATP  
165 cells had lower levels of transcripts, while the high ATP cells produced more transcripts (Figure  
166 4A, each dot represents measurement from a single cell). There was a particularly wide  
167 variation in the expression levels of *ackA* coding for acetate kinase.

168

169 We reasoned that quenching the noise will diminish persisters if it is indeed responsible for their  
170 formation. Ectopic overexpression of an enzyme should quench the noise in its expression. To  
171 test this, we cloned *ackA*, *acs* and *pta* genes into a chromosomally integrating plasmid under  
172 the control of a tetracycline inducible promoter. Cultures were grown in minimal media with  
173 acetate in the presence of anhydrotetracycline (Atc). Overexpression did not affect growth of  
174 these strains (Figure S2). Regardless of carbon source, no change in ATP was seen in the bulk  
175 population induced with Atc (Figure 4B, C). This is to be expected, since only persisters that  
176 express lower amounts of energy producing components will be sensitive to a decrease in  
177 substrate concentration. Changes in the metabolic state of this small subpopulation will not  
178 affect bulk ATP measurement. Strikingly, induction of *ackA* resulted in a 100 fold decrease in  
179 persisters tolerant of killing by Rif/Strep (Figure 4D). There was a notable but considerably  
180 smaller decrease in persisters upon overexpression of *acs*, and no change in cells



181 overexpressing *pta*. Importantly, survival was unaffected when these genes were  
182 overexpressed in minimal media with suboptimal glycerol (0.01%, Figure S3) as the sole carbon  
183 source (Figure 4E). These results suggest that *ackA* is the main noise generator in the acetate  
184 metabolic pathway and acts as a persister gene.

## 185 **Discussion**

186 Studies of antibiotic tolerance in *M. tuberculosis* and persister cells in other bacterial species  
187 have proceeded along parallel lines, with little cross-talk. There is a considerable body of  
188 evidence showing that metabolic downshift by a variety of means and mechanisms leads to  
189 antibiotic tolerance in different bacterial species (Amato, Orman, & Brynildsen, 2013; Shatalin et  
190 al., 2021). Of particular relevance to tuberculosis is the finding that establishing dormancy in *M.*  
191 *tuberculosis* under hypoxia involves a metabolic switch to synthesis of triglycerides, diminishing  
192 the available energy resources for other biosynthetic functions, and contributing to antibiotic  
193 tolerance (Baek et al., 2011). Our recent work established that both *E.coli* and *S. aureus*  
194 persisters are low ATP cells (Brian P. Conlon et al., 2016; Shan et al., 2017). Consistent with  
195 this, we show that *M. tuberculosis* persisters are also low ATP cells (Figure 1 and 2).  
196 Additionally, as with *E. coli* persisters (Manuse et al., 2021), *M. tuberculosis* persisters are  
197 stochastically formed during normal growth (Figure 2). These data suggest, as with other  
198 bacteria, that a low energy state underlies persister formation in *M. tuberculosis*.

199  
200 In *S. aureus* and *E. coli*, sorting of cells with low expression of Krebs cycle enzymes enriches in  
201 persisters (Brian P. Conlon et al., 2016; Shan et al., 2017; Zalis et al., 2019). This suggests that  
202 noise in expression of energy generating pathways drives a low ATP state and persister  
203 formation. To examine this relationship more directly we made use of simple medium with  
204 acetate as the sole carbon source. We reasoned that when substrate is limiting, noise in energy  
205 generating pathways will become more pronounced and lead to increases in low ATP cells and  
206 persisters. At a minimal concentration of acetate that does not yet diminish growth, ATP level



207 drops with a concomitant increase in persisters (Figure 3 and S1). To monitor ATP and noise in  
208 energy-generating component in the same cell, we employed single cell transcription analysis of  
209 sorted cells with low ATP determined by a specific fluorescent reporter ATeam1.03<sup>YEMK</sup>. This  
210 shows considerable noise in the expression of the acetate kinase AckA in low ATP *M.*  
211 *tuberculosis* cells when acetate is the sole carbon source (Figure 4A). Further, by quenching  
212 noise through overexpression of AckA we were able to dramatically decrease persisters (Figure  
213 4D) identifying AckA as the principal noise generator under these conditions.

214

215 Apart from a general low-energy mechanism, several specialized mechanisms have been  
216 described in bacteria that operate under particular conditions. In *E. coli*, DNA damage by  
217 fluoroquinolone antibiotics induces the SOS response leading to expression of the TisB toxin  
218 that forms an ion channel in the membrane, decreases the pmf and ATP, and is primarily  
219 responsible for persister formation under these conditions (Berghoff, Hoekzema, Aulbach, &  
220 Wagner, 2017; Dorr, Vulic, & Lewis, 2010; Gurnev, Ortenberg, Dorr, Lewis, & Bezrukov, 2012).  
221 In *E. coli*, a gain of function hipA7 (high persister) mutation in the HipA toxin produces hip  
222 mutants (Kaspy et al., 2013; Moyed & Bertrand, 1983) that are found in patients treated for  
223 urinary tract infection (Schumacher et al., 2015). Whether specialized mechanisms of persister  
224 formation exist in *M. tuberculosis* is an important open question. This is especially significant  
225 since mutations leading to increased tolerance have been shown to favor development of  
226 classical resistance in *E. coli* and *S. aureus* (Balaban, Merrin, Chait, Kowalik, & Leibler, 2004;  
227 Levin-Reisman et al., 2017; J. Liu, Gefen, Ronin, Bar-Meir, & Balaban, 2020; Moreno-Gamez et  
228 al., 2020). In tuberculosis, failure to clear the infection due to tolerance has been linked to  
229 development of resistance but whether hip mutations in *M. tuberculosis* favor selection of  
230 resistant mutants remains to be established.

231

232 A number of studies have linked persisters to disease, starting with the isolation of *P.*  
233 *aeruginosa* hip mutants from patients with cystic fibrosis undergoing lengthy antibiotic therapy  
234 (Bartell et al., 2021; Mulcahy, Burns, Lory, & Lewis, 2010). *hip* mutants have been identified in  
235 clinical isolates of *M. tuberculosis* as well (Torrey et al., 2016). In the case of *Salmonella*,  
236 entrance of cells into macrophages results in a dramatic increase in persisters (Helaine et al.,  
237 2014). *M. tuberculosis* similarly colonizes macrophages, upon which antibiotic tolerance of the  
238 bulk population increases (Y. Liu et al., 2016; Pieters, 2008). In *S. aureus*, a decrease in ATP  
239 and antibiotic tolerance in vivo can result from inhibition of respiration by compounds originating  
240 from a co-infection with *P. aeruginosa*, and by ROS produced by macrophages (Huemer et al.,  
241 2021; Radlinski et al., 2017; Rowe et al., 2020).

242

243 In *M. tuberculosis*, there are two different paths leading to quiescence , and both are likely  
244 responsible for the lengthy antibiotic therapy required to treat tuberculosis. A population entering  
245 into dormancy in response to external stressors such as hypoxia, and stochastically formed  
246 persisters appear to share the same basic mechanism of antibiotic tolerance – a low energy  
247 state. This suggests that a therapeutic approach against dormant cells will be effective  
248 irrespective of which path they used to enter into dormancy. However, while we have a sizable  
249 and growing (albeit slowly) arsenal of antibiotics that act against regular cells, discovery of anti-  
250 persister compounds is still in its infancy (Lewis, 2020), with but a few examples of anti-persister  
251 compounds(Brotz-Oesterhelt et al., 2005; B. P. Conlon et al., 2013; Griffith et al., 2019; Kim et  
252 al., 2018). An alternative approach is pulse-dosing with conventional antibiotics that has been  
253 described for eradicating a biofilm formed by *S. aureus* in vitro (Meyer, Taylor, Seidel, Gates, &  
254 Lewis, 2020). Combatting dormancy will require novel types of compounds and approaches.

255

256 Our findings suggest a general model for persister formation in bacteria, which is shared by *M.*  
257 *tuberculosis* (Figure 5). Noise in the expression of an energy-generating component such as

258 *ackA* results in rare cells that have low levels of ATP. This in turn will decrease the activity of  
259 targets, preventing antibiotics from corrupting them. The nature of the principal noise generator  
260 will depend on which metabolic pathway is dominant under given growth conditions. From this  
261 perspective, there will be many “persister genes” in *M. tuberculosis* and other bacteria. Noise  
262 quenching that we describe in this study provides a direct means to test the involvement of a  
263 given gene in persister formation. This approach should also be applicable *in vivo*, where  
264 tetracycline inducible gene expression has been used. Notably, noise quenching by  
265 overexpression provides a simple approach to quantitatively determine the relative input of any  
266 gene into persister formation.

## 267 **Materials and Methods**

### 268 Bacterial strains and media

269 *M. tuberculosis* strain used for all experiments was H37Rv MC<sup>2</sup>6020. *M. tuberculosis*  
270 was grown in Difco 7H9 supplemented with 10% OADC, 5% glycerol, lysine (80 µg/mL),  
271 pantothenate (24 µg/mL), and 0.05% tyloxapol. For CFU enumeration *M. tuberculosis* was  
272 plated on Difco 7H10 supplemented with 10% OADC, 5% glycerol, lysine (80 µg/mL), and  
273 pantothenate (24 µg/mL). To make minimal media 0.5 g asparagine, 1 g NH<sub>2</sub>PO<sub>4</sub>, 2.5 g  
274 Na<sub>2</sub>HPO<sub>4</sub>, 50 mg ferric ammonium citrate, 0.5 g MgSO<sub>4</sub>, 0.5 mg CaCl<sub>2</sub>, and 0.1 mg ZnSO<sub>4</sub>  
275 were dissolved in 1 L of water. Lysine (80 µg/mL), pantothenate (24 µg/mL), and tyloxapol  
276 (0.05%) were added and the media was filter sterilized. Carbon sources were added to the  
277 media at the indicated concentrations prior to experiment. For construction of overexpression  
278 strains, genes were amplified using primers in supplementary table xx and cloned into plasmid  
279 pTetSGkan. Plasmids were transformed into *M. tuberculosis* and selected on 7H10 complete  
280 media supplemented with 40 µg/mL Kanamycin.

### 281 Growth measurements

282 For analysis of growth in minimal media with single carbon sources, *M. tuberculosis*  
283 were grown in 7H9 complete media, washed twice in PBS, then resuspended in minimal media

284 with the indicated carbon source to an OD600 ~0.01 at a volume of 10mL. The cultures were  
285 grown for a week with shaking at 37C. Time points were plated for CFU at Day 0, 2, 4, and 7.

### 286 Antibiotic survival assay

287 For analysis of bedaquiline effects on survival, cultures were challenged in exponential  
288 phase when OD600 ~0.8. For analysis of survival in exponential and stationary phase, cultures  
289 were challenged when OD600 ~0.8 (exponential) or ~1.8-2 (Stationary). For analysis of survival  
290 in minimal media as well as overexpression analysis in minimal media, cultures were grown for  
291 7 days under the indicated conditions and then challenged. In all cases, an aliquot was removed  
292 before treatment, serial diluted, and plated for day 0 CFU enumeration. Cultures were treated  
293 with the indicated antibiotic(s) for 7 days after which an aliquot was removed, washed once in  
294 PBS, serial diluted and plated for CFU. Percent survival was calculated as follows: (CFU Day 7/  
295 CFU Day 0)\*100. For analysis of survival in bulk cultures, antibiotic concentrations used were  
296 Rifampicin (10 µg/mL) + Streptomycin (10 µg/mL) or Isoniazid (20 µg/mL). Sorted cells were  
297 treated with Rifampicin (1 µg/mL) or Streptomycin (2 µg/mL).

### 298 ATP Quantification

299 Prior to antibiotic treatment aliquots of cultures were washed with PBS, and intracellular  
300 ATP concentration was measured by BacTiter Glo kit (Promega, Madison, WI, USA) according  
301 to the manufacturer's instructions. Bioluminescence values (RLU) were normalized to OD<sub>600</sub>.

### 302 Flow Cytometry and Fluorescent Activated Cell Sorting

303 Single cell ATP was analyzed using *M. tuberculosis* expressing pND235-YEMK. This  
304 plasmid encodes a FRET based ATP biosensor adapted for use in *M. tuberculosis* (Maglica et.  
305 al., 2015). FRET-based fluorescence of single cells were collected on BD FACS Aria II flow  
306 cytometer (BD Biosciences, San Jose, CA, USA) with a 70-µm nozzle. Fluorescence was  
307 collected for YFP emission at two separate laser excitations with band pass filters optimized for  
308 YFP, excitation at 445nm (CFP<sub>ex</sub> → YFP<sub>em</sub>) (FRET) and excitation at 488nm (YFP<sub>ex</sub> → YFP<sub>em</sub>).  
309 Single cell normalized ATP is expressed as the FRET/YFP ratio [(CFP<sub>ex</sub> → YFP<sub>em</sub>)/(YFP<sub>ex</sub> →

310 YFP<sub>em</sub>]). For flow cytometry analysis of cultures expressing pND235-YEMK, a minimum of 20,  
311 000 events were collected. The events were gated for size (FSC-A, SSC-A), YFP positivity, and  
312 finally ratiometric signal of ATP (FRET/YFP) was determined. Aliquots of the cultures were  
313 directly analyzed on the flow cytometer in the experimental media conditions. All analysis was  
314 conducted in FlowJo (BD). For survival sorting experiments, a liquid culture of *M. tuberculosis*  
315 expressing pND235-YEMK was grown to stationary phase and then diluted 1:100 in fresh 7H9  
316 media. The culture was grown to late stationary phase (~2 weeks), diluted 1:20 in PBS, and  
317 loaded onto the BD FACS Aria II. To sort based on the normalized ratiometric signal from  
318 pND235-YEMK, the ratio feature of the FACS Diva software was enabled to calculate  
319 FRET/YFP signal in real time. Events were first gated for size (FSC-A, SSC-A), and YFP  
320 positivity, followed by analysis of single cells as a dot plot of FRET/YFP versus YFP signal.  
321 “Low ATP” and “High ATP” gates were set to 2% of the total population. YFP+ cells were gated  
322 as any cell expressing YFP above background levels. A total of 5,000 low ATP, high ATP, or  
323 YFP+ cells were sorted directly into 1 mL 7H9 liquid media containing either rifampicin (1  
324 µg/mL) or streptomycin (2 µg/mL). The sample was immediately serial diluted and plated on  
325 7H10 to determine Day 0 CFU/mL. The sample was then plated to determine CFU/mL on days  
326 1, 2, and 3 post-treatment. At all timepoints, a 95 µL aliquot of each sample was removed and  
327 added to 5 µL 1% activated charcoal (final concentration of activated charcoal is 0.05%) before  
328 being serial diluted to limit the effects of the antibiotics in the media on CFU determination. Two  
329 technical replicates were collected per experiment reversing the order of sample collection  
330 between replicates to limit effects of collection timing bias. The experiment was repeated a  
331 minimum of three times.

### 332 Single cell RT-qPCR

333 Protocol for single cell RT-qPCR was based on a recently developed method (Srinivas  
334 et. al., 2020). Cultures expressing pND235-YEMK growing in minimal media with 2.5 mM  
335 acetate as the sole carbon source were grown to stationary phase. Low ATP, High ATP, and

336 YFP+ cells were sorted based on the criteria described above. Single Low ATP, High ATP, or  
337 YFP+ cells were sorted directly into individual wells of a 96 well Bio-Rad (Hercules, CA, USA)  
338 PCR plate containing 2  $\mu$ L lysis solution comprising 10% NP-40, SuperScript IV Vilo master mix  
339 (Invitrogen, Waltham, MA, USA), T4 Gene32 (Thermofisher, Waltham, MA, USA), SUPERase  
340 RNase Inhibitor (Invitrogen), and 10 pM RNA spike in control. Firefly luciferase (FLuc) RNA  
341 served as the spike in control and was generated using HiScribe T7 Quick RNA Synthesis kit  
342 (NEB, Ipswich, MA, USA) using linearized plasmid DNA encoding FLuc gene as template. A  
343 total of 16 Low ATP, High ATP, and YFP+ cells were sorted per experiment. After sorting, the  
344 cells were lysed by first flash freezing in liquid nitrogen, then placing the plate at -80C for 1 hour,  
345 followed by thawing at room temperature. The plate was then transferred to a thermocycler and  
346 cDNA was generated following cycling conditions in manufacturers protocol. Following cDNA  
347 synthesis, 25 cycles of pre-amplification was conducted using gene specific primers. Excess  
348 primer was then removed via incubation with Exonuclease I (Thermofisher) for 1 hour at 37C.  
349 One tenth (2  $\mu$ L) of pre-amplified cDNA was then used to assess the single cell expression of  
350 each gene of interest using BioRad SsoAdvanced Universal SYBR Green Supermix on a  
351 BioRad CFX96 system. Amplification of the E. coli origin of replication (oriE) from pND235-  
352 YEMK served as the lysis control. Wells that generated no amplification or a threshold cycle (Ct)  
353 > 40 for oriE were considered failed lysis and removed from analysis. For all other genes,  
354 amplification values with Ct > 40 were removed from analysis. Ct values of genes were  
355 corrected for the difference between FLuc Ct in each well with the median FLuc Ct. Finally,  
356 expression of each gene was normalized to oriE amplification in each well as it is assumed oriE  
357 exist as a single copy. All primers used for single cell RT-qPCR analysis can be found in Table  
358 S1.

### 359 Statistics

360 All statistical analysis was conducted using GraphPad Prism V 9.

### 361 **Acknowledgements**

362 This work was supported by grant R01 AI141966 from the NIH to K.L. Plasmid pND235-YEMK  
363 was a kind gift from John D. McKinney at the School of Life Sciences, Swiss Federal Institute of  
364 Technology in Lausanne (EPFL), Lausanne, Switzerland.

### 365 **Competing Interests**

366 The authors declare no competing interests.

### 367 **References**

- 368 Amato, S. M., Orman, M. A., & Brynildsen, M. P. (2013). Metabolic control of persister formation in  
369 *Escherichia coli*. *Mol Cell*, *50*(4), 475-487. doi:10.1016/j.molcel.2013.04.002
- 370 Andries, K., Verhasselt, P., Guillemont, J., Gohlmann, H. W., Neefs, J. M., H., W., . . . Jarlier, V. (2005). A  
371 Diarylquinolone Drug Active on the ATP Synthase of *Mycobacterium tuberculosis*. *Science*, *307*,  
372 223-227.
- 373 Baek, S. H., Li, A. H., & Sassetti, C. M. (2011). Metabolic regulation of mycobacterial growth and  
374 antibiotic sensitivity. *PLoS Biol*, *9*(5), e1001065. doi:10.1371/journal.pbio.1001065
- 375 Baker, J. J., Johnson, B. K., & Abramovitch, R. B. (2014). Slow growth of *Mycobacterium tuberculosis* at  
376 acidic pH is regulated by phoPR and host-associated carbon sources. *Mol Microbiol*, *94*(1), 56-69.  
377 doi:10.1111/mmi.12688
- 378 Balaban, N. Q., Merrin, J., Chait, R., Kowalik, L., & Leibler, S. (2004). Bacterial Persistence as a Phenotypic  
379 Switch. *Science*, *305*, 1622-1625.
- 380 Bartell, J. A., Sommer, L. M., Marvig, R. L., Skov, M., Pressler, T., Molin, S., & Johansen, H. K. (2021).  
381 Omics-based tracking of *Pseudomonas aeruginosa* persistence in "eradicated" cystic fibrosis  
382 patients. *Eur Respir J*, *57*(4). doi:10.1183/13993003.00512-2020
- 383 Berghoff, B. A., Hoekzema, M., Aulbach, L., & Wagner, E. G. (2017). Two regulatory RNA elements affect  
384 TisB-dependent depolarization and persister formation. *Mol Microbiol*, *103*(6), 1020-1033.  
385 doi:10.1111/mmi.13607
- 386 Bigger, J. (1944). Treatments of Staphylococcal Infections with Penicillin. *Lancet*, *244*, 497-500.
- 387 Boldrin, F., Provedi, R., Cioetto Mazzabo, L., Segafreddo, G., & Manganelli, R. (2020). Tolerance and  
388 Persistence to Drugs: A Main Challenge in the Fight Against *Mycobacterium tuberculosis*. *Front*  
389 *Microbiol*, *11*, 1924. doi:10.3389/fmicb.2020.01924
- 390 Brotz-Oesterhelt, H., Beyer, D., Kroll, H. P., Endermann, R., Ladel, C., Schroeder, W., . . . Labischinski, H.  
391 (2005). Dysregulation of bacterial proteolytic machinery by a new class of antibiotics. *Nat Med*,  
392 *11*(10), 1082-1087. doi:10.1038/nm1306
- 393 Conlon, B. P., Nakayasu, E. S., Fleck, L. E., LaFleur, M. D., Isabella, V. M., Coleman, K., . . . Lewis, K. (2013).  
394 Activated ClpP kills persisters and eradicates a chronic biofilm infection. *Nature*, *503*(7476), 365-  
395 370. doi:10.1038/nature12790
- 396 Conlon, B. P., Rowe, S. E., Gandt, A. B., Nuxoll, A. S., Donegan, N. P., Zalis, E. A., . . . Lewis, K. (2016).  
397 Persister formation in *Staphylococcus aureus* is associated with ATP depletion. *Nature*  
398 *Microbiology*, *1*(5). doi:10.1038/nmicrobiol.2016.51
- 399 Datta, G., Nieto, L. M., Davidson, R. M., Mehaffy, C., Pederson, C., Dobos, K. M., & Strong, M. (2016).  
400 Longitudinal whole genome analysis of pre and post drug treatment *Mycobacterium*  
401 *tuberculosis* isolates reveals progressive steps to drug resistance. *Tuberculosis (Edinb)*, *98*, 50-  
402 55. doi:10.1016/j.tube.2016.02.004
- 403 Davis, B. D., Chen, L., & Tai, P. C. (1986). Misread protein creates membrane channels: An essential step  
404 in the bactericidal action of aminoglycosides. *Proc Natl Acad Sci U S A*, *83*, 6164-6168.



- 405 Dorr, T., Vulic, M., & Lewis, K. (2010). Ciprofloxacin causes persister formation by inducing the TisB toxin  
406 in *Escherichia coli*. *PLoS Biol*, *8*(2), e1000317. doi:10.1371/journal.pbio.1000317
- 407 Dutta, N. K., Klinkenberg, L. G., Vazquez, M., Segura-Carro, D., Colmenarejo, G., Ramon, F., . . .  
408 Karakousis, P. C. (2019). Inhibiting the stringent response blocks *Mycobacterium tuberculosis*  
409 entry into quiescence and reduces persistence. *Science Advances*, *5*(3).
- 410 Gengenbacher, M., Rao, S. P. S., Pethe, K., & Dick, T. (2010). Nutrient-starved, non-replicating  
411 *Mycobacterium tuberculosis* requires respiration, ATP synthase and isocitrate lyase for  
412 maintenance of ATP homeostasis and viability. *Microbiology (Reading)*, *156*(Pt 1), 81-87.  
413 doi:10.1099/mic.0.033084-0
- 414 Griffith, E. C., Zhao, Y., Singh, A. P., Conlon, B. P., Tangallapally, R., Shadrack, W. R., . . . Lee, R. E. (2019).  
415 Ureadepsipeptides as ClpP Activators. *ACS Infect Dis*, *5*(11), 1915-1925.  
416 doi:10.1021/acsinfecdis.9b00245
- 417 Guirado, E., & Schlesinger, L. S. (2013). Modeling the *Mycobacterium tuberculosis* Granuloma - the  
418 Critical Battlefield in Host Immunity and Disease. *Front Immunol*, *4*, 98.  
419 doi:10.3389/fimmu.2013.00098
- 420 Gurnev, P. A., Ortenberg, R., Dorr, T., Lewis, K., & Bezrukov, S. M. (2012). Persister-promoting bacterial  
421 toxin TisB produces anion-selective pores in planar lipid bilayers. *FEBS Lett*, *586*(16), 2529-2534.  
422 doi:10.1016/j.febslet.2012.06.021
- 423 Helaine, S., Cheverton, A. M., Watson, K. G., Faure, L. M., Mathews, S. A., & Holden, D. W. (2014).  
424 Internalization of *Salmonella* by Macrophages Induces Formation of Nonreplicating Persisters.  
425 *Science*, *343*, 204-208.
- 426 Huemer, M., Mairpady Shambat, S., Bergada-Pijuan, J., Soderholm, S., Boumasmoud, M., Vulin, C., . . .  
427 Zinkernagel, A. S. (2021). Molecular reprogramming and phenotype switching in *Staphylococcus*  
428 *aureus* lead to high antibiotic persistence and affect therapy success. *Proc Natl Acad Sci U S A*,  
429 *118*(7). doi:10.1073/pnas.2014920118
- 430 Jain, P., Weinrick, B. C., Kalivoda, E. J., Yang, H., Munsamy, V., Vilcheze, C., . . . Jacobs, W. R., Jr. (2016).  
431 Dual-Reporter *Mycobacteriophages* (Phi2DRMs) Reveal Preexisting *Mycobacterium tuberculosis*  
432 Persistent Cells in Human Sputum. *mBio*, *7*(5). doi:10.1128/mBio.01023-16
- 433 Kaspy, I., Rotem, E., Weiss, N., Ronin, I., Balaban, N. Q., & Glaser, G. (2013). HipA-mediated antibiotic  
434 persistence via phosphorylation of the glutamyl-tRNA-synthetase. *Nat Commun*, *4*, 3001.  
435 doi:10.1038/ncomms4001
- 436 Keren, I., Kaldalu, N., Spoering, A., Wang, Y., & Lewis, K. (2004). Persister cells and tolerance to  
437 antimicrobials. *FEMS Microbiology Letters*, *230*(1), 13-18. doi:10.1016/s0378-1097(03)00856-5
- 438 Keren, I., Minami, S., Rubin, E., & Lewis, K. (2011). Characterization and transcriptome analysis of  
439 *Mycobacterium tuberculosis* persisters. *mBio*, *2*(3), e00100-00111. doi:10.1128/mBio.00100-11
- 440 Kim, W., Zhu, W., Hendricks, G. L., Van Tyne, D., Steele, A. D., Keohane, C. E., . . . Mylonakis, E. (2018). A  
441 new class of synthetic retinoid antibiotics effective against bacterial persisters. *Nature*,  
442 *556*(7699), 103-107. doi:10.1038/nature26157
- 443 Koul, A., Vranckx, L., Dhar, N., Gohlmann, H. W., Ozdemir, E., Neefs, J. M., . . . Bald, D. (2014). Delayed  
444 bactericidal response of *Mycobacterium tuberculosis* to bedaquiline involves remodelling of  
445 bacterial metabolism. *Nat Commun*, *5*, 3369. doi:10.1038/ncomms4369
- 446 Leistikow, R. L., Morton, R. A., Bartek, I. L., Frimpong, I., Wagner, K., & Voskuil, M. I. (2010). The  
447 *Mycobacterium tuberculosis* DosR regulon assists in metabolic homeostasis and enables rapid  
448 recovery from nonrespiring dormancy. *J Bacteriol*, *192*(6), 1662-1670. doi:10.1128/JB.00926-09
- 449 Levin-Reisman, I., Ronin, I., Gefen, O., Braniss, I., Shores, N., & Balaban, N. Q. (2017). Antibiotic  
450 tolerance facilitates the evolution of resistance. *Science*, *355*, 826-830.
- 451 Lewis, K. (2020). The Science of Antibiotic Discovery. *Cell*, *181*(1), 29-45. doi:10.1016/j.cell.2020.02.056

- 452 Lewis, K., & Manuse, S. (2019). Persister formation and antibiotic tolerance of chronic infections.  
453 *Persister cells and infectious disease: Springer*, 59-75.
- 454 Liu, J., Gefen, O., Ronin, I., Bar-Meir, M., & Balaban, N. Q. (2020). Effect of tolerance on the evolution of  
455 antibiotic resistance under drug combinations. *Science*, 367, 200-204.
- 456 Liu, Y., Tan, S., Huang, L., Abramovitch, R. B., Rohde, K. H., Zimmerman, M. D., . . . Russell, D. G. (2016).  
457 Immune activation of the host cell induces drug tolerance in Mycobacterium tuberculosis both  
458 in vitro and in vivo. *J Exp Med*, 213(5), 809-825. doi:10.1084/jem.20151248
- 459 Maglica, Z., Ozdemir, E., & McKinney, J. D. (2015). Single-cell tracking reveals antibiotic-induced changes  
460 in mycobacterial energy metabolism. *mBio*, 6(1), e02236-02214. doi:10.1128/mBio.02236-14
- 461 Manuse, S., Shan, Y., Canas-Duarte, S. J., Bakshi, S., Sun, W. S., Mori, H., . . . Lewis, K. (2021). Bacterial  
462 persisters are a stochastically formed subpopulation of low-energy cells. *PLoS Biol*, 19(4),  
463 e3001194. doi:10.1371/journal.pbio.3001194
- 464 Meyer, K. J., Taylor, H. B., Seidel, J., Gates, M. F., & Lewis, K. (2020). Pulse Dosing of Antibiotic Enhances  
465 Killing of a Staphylococcus aureus Biofilm. *Front Microbiol*, 11, 596227.  
466 doi:10.3389/fmicb.2020.596227
- 467 Moreno-Gamez, S., Kiviet, D. J., Vulin, C., Schlegel, S., Schlegel, K., van Doorn, G. S., & Ackermann, M.  
468 (2020). Wide lag time distributions break a trade-off between reproduction and survival in  
469 bacteria. *Proc Natl Acad Sci U S A*, 117(31), 18729-18736. doi:10.1073/pnas.2003331117
- 470 Moyed, H. S., & Bertrand, K. P. (1983). hipA, a Newly Recognized Gene of Escherichia coli K-12 That  
471 Affects Frequency of Persistence After Inhibition of Murein Synthesis. *Journal of Bacteriology*,  
472 155(2), 768-775.
- 473 Mulcahy, L. R., Burns, J. L., Lory, S., & Lewis, K. (2010). Emergence of Pseudomonas aeruginosa strains  
474 producing high levels of persister cells in patients with cystic fibrosis. *J Bacteriol*, 192(23), 6191-  
475 6199. doi:10.1128/JB.01651-09
- 476 Namugenyi, S. B., Aagesen, A. M., Elliott, S. R., & Tischler, A. D. (2017). Mycobacterium tuberculosis  
477 PhoY Proteins Promote Persister Formation by Mediating Pst/SenX3-RegX3 Phosphate Sensing.  
478 *mBio*, 8(4). doi:10.1128/mBio.00494-17
- 479 Pieters, J. (2008). Mycobacterium tuberculosis and the macrophage: maintaining a balance. *Cell Host*  
480 *Microbe*, 3(6), 399-407. doi:10.1016/j.chom.2008.05.006
- 481 Primm, T. P., Andersen, S. J., Mizrahi, V., Avarbock, D., Rubin, H., & Barry, C. E., 3rd. (2000). The  
482 Stringent Response of Mycobacterium tuberculosis Is Required for Long-Term Survival. *Journal*  
483 *of Bacteriology*, 182(17), 4889-4898.
- 484 Radlinski, L., Rowe, S. E., Kartchner, L. B., Maile, R., Cairns, B. A., Vitko, N. P., . . . Conlon, B. P. (2017).  
485 Pseudomonas aeruginosa exoproducts determine antibiotic efficacy against Staphylococcus  
486 aureus. *PLoS Biol*, 15(11), e2003981. doi:10.1371/journal.pbio.2003981
- 487 Rowe, S. E., Wagner, N. J., Li, L., Beam, J. E., Wilkinson, A. D., Radlinski, L. C., . . . Conlon, B. P. (2020).  
488 Reactive oxygen species induce antibiotic tolerance during systemic Staphylococcus aureus  
489 infection. *Nat Microbiol*, 5(2), 282-290. doi:10.1038/s41564-019-0627-y
- 490 Sacchettini, J. C., Rubin, E. J., & Freundlich, J. S. (2008). Drugs versus bugs: in pursuit of the persistent  
491 predator Mycobacterium tuberculosis. *Nat Rev Microbiol*, 6(1), 41-52. doi:10.1038/nrmicro1816
- 492 Schumacher, M. A., Balani, P., Min, J., Chinnam, N. B., Hansen, S., Vulic, M., . . . Brennan, R. G. (2015).  
493 HipBA-promoter structures reveal the basis of heritable multidrug tolerance. *Nature*, 524(7563),  
494 59-64. doi:10.1038/nature14662
- 495 Shan, Y., Brown Gandt, A., Rowe, S. E., Deisinger, J. P., Conlon, B. P., & Lewis, K. (2017). ATP-Dependent  
496 Persister Formation in Escherichia coli. *mBio*, 8(1). doi:10.1128/mBio.02267-16
- 497 Shatalin, K., Nuthanakanti, A., Kaushik, A., Shishov, D., Peselis, A., Shamovsky, D., . . . Nudler, E. (2021).  
498 Inhibitors of bacterial H<sub>2</sub>S biogenesis targeting antibiotic resistance and tolerance. *Science*, 372,  
499 1169-1175.

500 Sonnenkalb, L., Strohe, G., Dreyer, V., Andres, S., Hillemann, D., Maurer, F. P., . . . Merker, M. (2021).  
501 Microevolution of Mycobacterium tuberculosis Subpopulations and Heteroresistance in a  
502 Patient Receiving 27 Years of Tuberculosis Treatment in Germany. *Antimicrob Agents*  
503 *Chemother*, 65(7), e0252020. doi:10.1128/AAC.02520-20  
504 Srinivas, V., Arrieta-Ortiz, M. L., Kaur, A., Peterson, E. J. R., & Baliga, N. S. (2020). PerSort Facilitates  
505 Characterization and Elimination of Persister Subpopulation in Mycobacteria. *mSystems*, 5(6).  
506 doi:10.1128/mSystems.01127-20  
507 Torrey, H. L., Keren, I., Via, L. E., Lee, J. S., & Lewis, K. (2016). High Persister Mutants in Mycobacterium  
508 tuberculosis. *PLoS One*, 11(5), e0155127. doi:10.1371/journal.pone.0155127  
509 Wayne, L. G., & Hayes, L. G. (1996). An In Vitro Model for the Sequential Study of Shiftdown of  
510 Mycobacterium tuberculosis through Two Stages of Nonreplicating Persistence. *Infect Immun*,  
511 64(6), 2062-2069.  
512 WHO. (2019). *Global Tuberculosis Report 2019*. Retrieved from  
513 Zalis, E. A., Nuxoll, A. S., Manuse, S., Clair, G., Radlinski, L. C., Conlon, B. P., . . . Lewis, K. (2019).  
514 Stochastic Variation in Expression of the Tricarboxylic Acid Cycle Produces Persister Cells. *mBio*,  
515 10(5). doi:10.1128/mBio.01930-19  
516 Zheng, H., Colvin, C. J., Johnson, B. K., Kirchhoff, P. D., Wilson, M., Jorgensen-Muga, K., . . . Abramovitch,  
517 R. B. (2017). Inhibitors of Mycobacterium tuberculosis DosRST signaling and persistence. *Nat*  
518 *Chem Biol*, 13(2), 218-225. doi:10.1038/nchembio.2259  
519 Zumla, A., Nahid, P., & Cole, S. T. (2013). Advances in the development of new tuberculosis drugs and  
520 treatment regimens. *Nat Rev Drug Discov*, 12(5), 388-404. doi:10.1038/nrd4001  
521

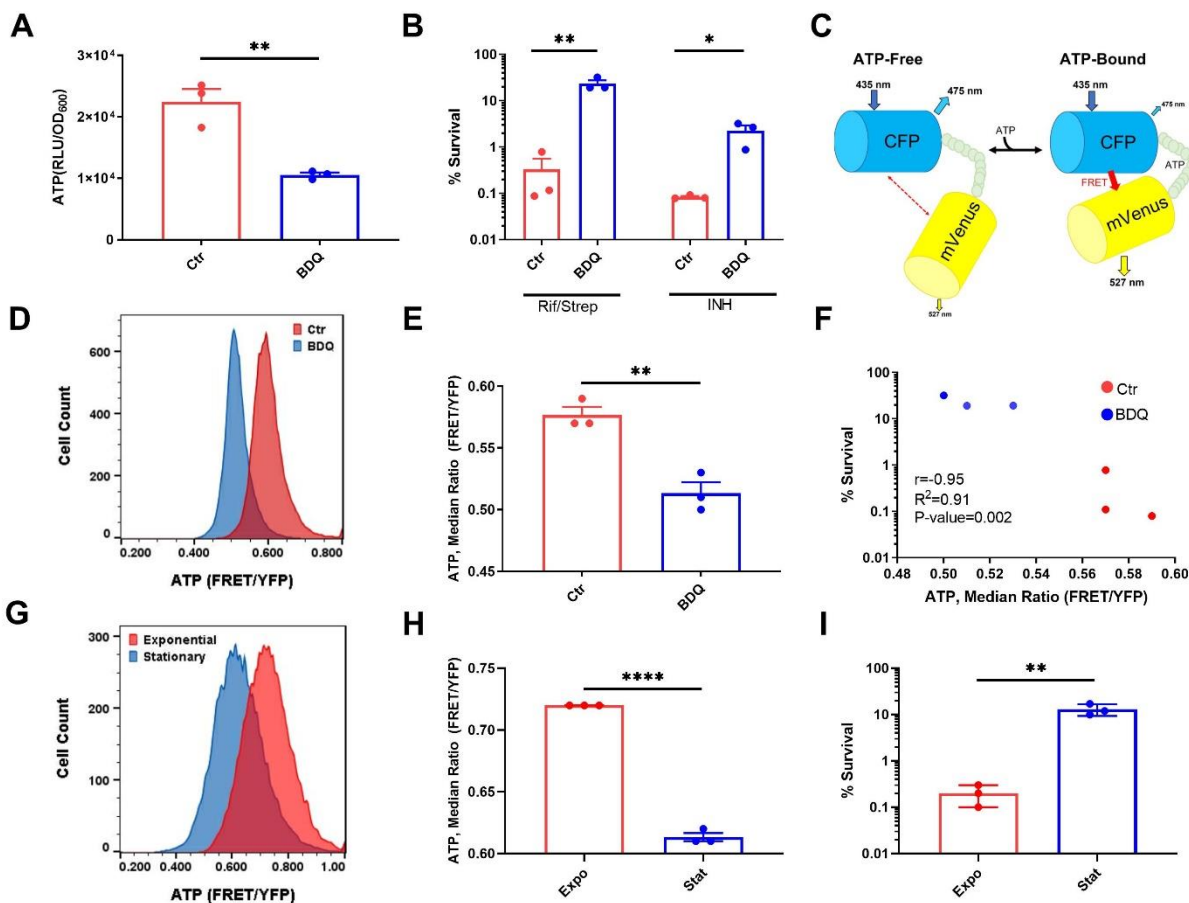

522  
523 **Fig. 1: ATP level determines persister formation**

524  
525 Cultures of *M. tuberculosis* were grown in minimal medium with 5 mM acetate and treated with  
526 Bedaquiline (BDQ) for 4 hours (A-F) or in 7H9 rich medium (G-I). (A) Luminescence based ATP  
527 measurement after treatment with BDQ. Data are displayed as relative light units (RLU)  
528 normalized to OD<sub>600</sub> of the culture. (B) Survival of BDQ treated cells after a challenge with either  
529 rifampicin (10 µg/mL) + streptomycin (10 µg/mL) or isoniazid (20 µg/mL) for 7 days. CFU/mL  
530 was determined at days 0 and 7. Data are displayed as percent survival. (C) Schematic of  
531 ratiometric FRET based ATP biosensor ATeam1.03<sup>YEMK</sup>. (D) Representative flow cytometry  
532 analysis of *M. tuberculosis* expressing ATeam1.03<sup>YEMK</sup> treated with BDQ for 4 hours. Data  
533 displayed as FRET signal normalized to reporter expression (YFP). (E) Quantification of flow  
534 cytometry analysis in (D). Data are displayed as the median FRET/YFP ratio. (F) Correlation  
535 analysis of percent survival and median FRET/YFP ratio of untreated and BDQ treated *M.*

536 *tuberculosis* cells. Data are representative of at least 3 biological replicates. Ctr=control,  
537 untreated cultures. (G) Representative example of single cell ATP analysis via ATeam1.03<sup>YEMK</sup>  
538 of exponential and stationary phase *M. tuberculosis* cells. (H) Quantification of media  
539 FRET/YFP ratio in (G).(I) Survival of exponential and stationary cells after treatment with  
540 rifampicin (10 µg/mL) + streptomycin (10 µg/mL) for 7 days. CFU/mL were determined before  
541 antibiotic addition and after 7 days of treatment. P< 0.05, \*, P< 0.01, \*\*, P< 0.0001, \*\*\*\*. Data  
542 are representative of three biological replicates. Significance was determined by unpaired two  
543 tailed t-test.

544  
545  
546  
547  
548  
549  
550  
551  
552  
553  
554  
555  
556  
557  
558  
559  
560  
561  
562  
563  
564  
565  
566  
567

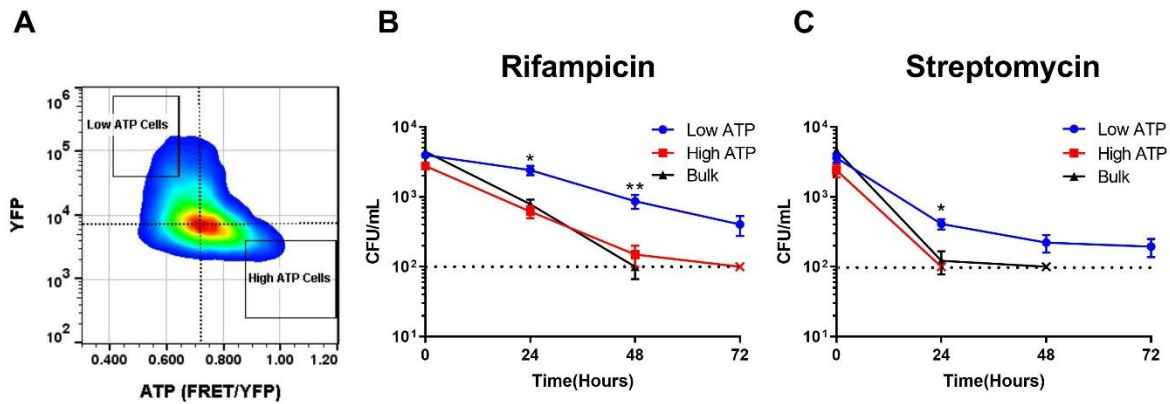

568  
569  
570  
571

**Fig. 2: Low ATP *M. tuberculosis* cells are multi-drug tolerant**

572 (A) Gating strategy for sorting low and high ATP *M. tuberculosis* from a population expressing  
573 ATeam1.03<sup>YEMK</sup>. Low and high ATP gates represent 2% of the total population. (B, C) 5,000 low,  
574 high, or bulk population cells were sorted directly into 7H9 medium containing (B) rifampicin (1  
575  $\mu\text{g/mL}$ ) or (C) streptomycin (2  $\mu\text{g/mL}$ ). Survival was monitored by determining CFU/mL at time  
576 0, 24, 48, and 72 hours. A dotted line represents the limit of detection. X's indicate the time point  
577 at which a population fell below the limit of detection.  $P < 0.05$ , \*,  $P < 0.01$ , \*\*. Data are  
578 unpaired t-test.

579  
580



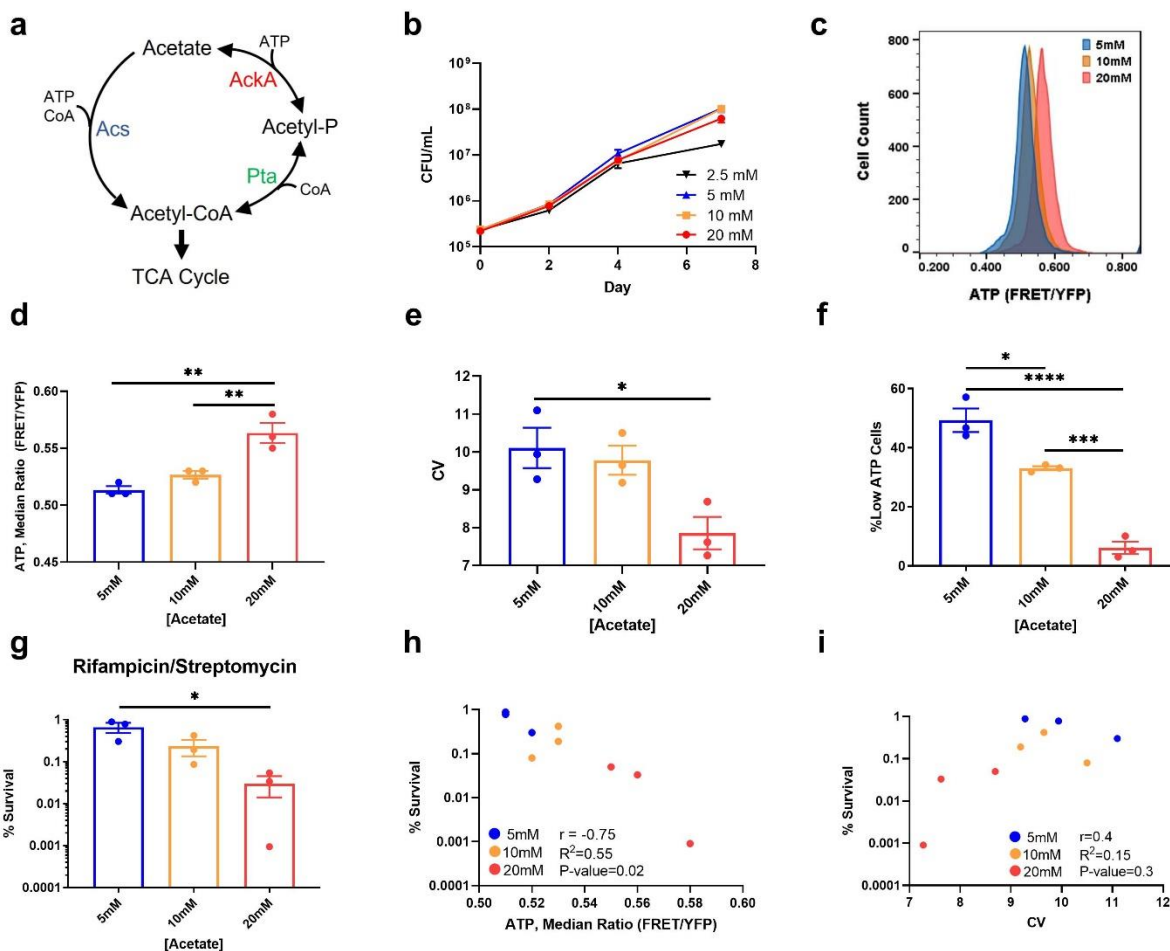

581  
582 **Fig. 3: Limiting acetate increases noise in ATP levels, and persists**  
583

584 (A) Schematic of acetate catabolism genes in *M. tuberculosis*. Acetate is converted to acetyl-  
585 CoA by Acs in a single step reaction or by AckA and Pta in a two-step reaction. (B) Growth curve  
586 of *M. tuberculosis* in minimal media with varying concentrations of acetate as the sole carbon  
587 source. (C) Representative example of flow cytometry analysis of *M. tuberculosis* expressing  
588 ATeam1.03<sup>YEMK</sup>. *M. tuberculosis* was grown in minimal media with the indicated concentrations  
589 of acetate for 1 week before being analyzed. (D) Quantification of median FRET/YFP ratio  
590 generated by Ateam1.03<sup>YEMK</sup> in (C). **e**, Quantification of coefficient of variation (CV) of  
591 FRET/YFP ratio in (C). **f**, Quantification of "Low ATP Cells" defined as events falling below a  
592 gate set at FRET/YFP ratio one standard deviation below median ratio in 20 mM sample, the  
593 sample with the highest median FRET/YFP ratio. (G) Survival of *M. tuberculosis* grown at



594 indicated concentrations of acetate after being challenged with rifampicin (10 µg/mL) +  
595 streptomycin (10 µg/mL) for seven days. (H) Correlation analysis of survival and median  
596 FRET/YFP ratio of populations. (I) Correlation analysis of survival and CV of FRET/YFP ratio.  
597  $P < 0.05$ , \*,  $P < 0.01$ , \*\*,  $P < 0.001$ , \*\*\*,  $P < 0.0001$ , \*\*\*\*. Data are representative of at least three  
598 biological replicates. Significance determined by one-way anova with Tukey's post test.

599  
600  
601  
602  
603  
604  
605  
606  
607  
608  
609  
610  
611  
612  
613  
614  
615  
616

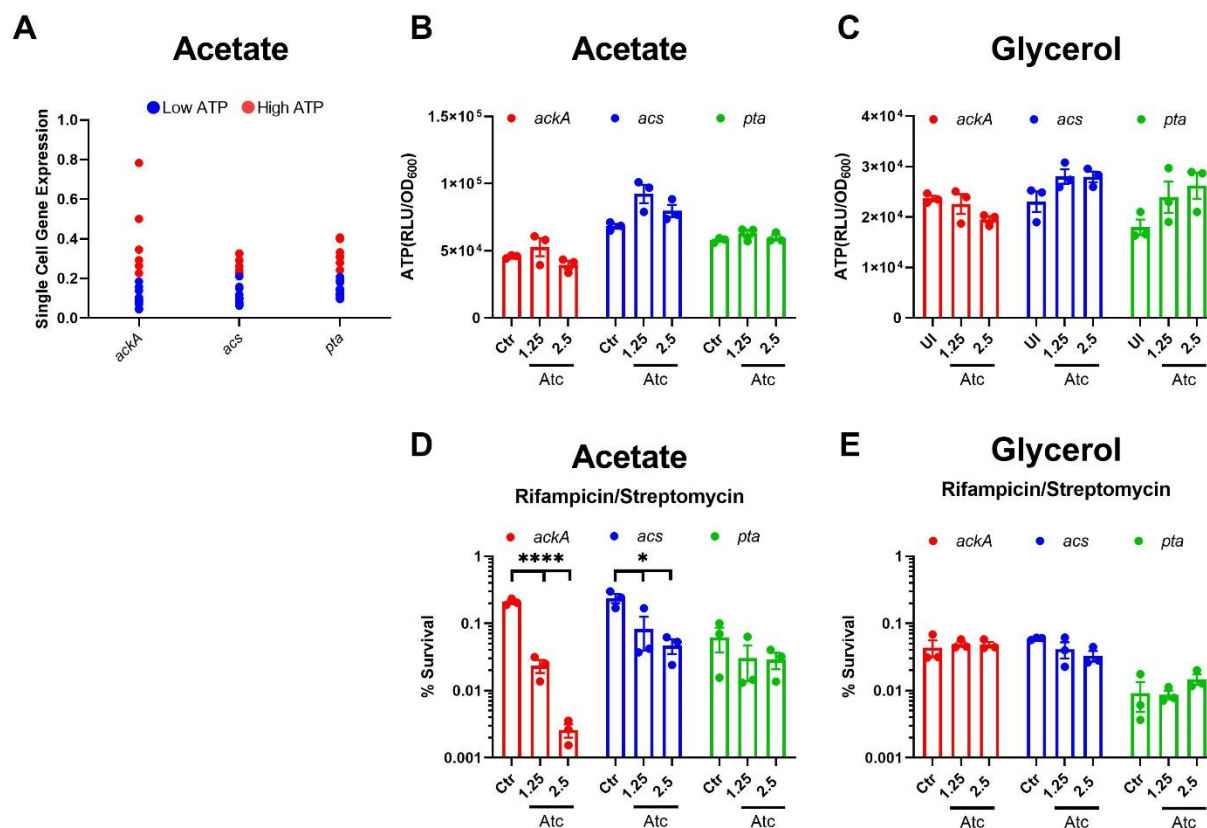

617  
 618 **Fig. 4: Noise quenching in *ackA* expression reduces drug tolerant persisters**  
 619  
 620 (A) Single cell expression analysis of low and high ATP cells sorted from a minimal medium with  
 621 2.5 mM acetate as the carbon source. *M. tuberculosis* expressing ATeam1.03<sup>YEMK</sup> was analyzed  
 622 via FACS and a single low or high ATP cell was dispensed into a well of a 96 well qPCR plate.  
 623 “Low” and “High” ATP cells were gated as in Figure 2A. Normalized expression of the indicated  
 624 genes was determined. Expression was normalized to the threshold cycle (Ct) value  
 625 determined from the origin of replication of pND235-YEMK (plasmid expressing  
 626 ATeam1.03<sup>YEMK</sup>). (B,C) ATP in a population of *M. tuberculosis* overexpressing *acs*, *ackA*, or *pta*  
 627 in minimal media with 2.5mM acetate (B) or 0.01% glycerol (C) as the sole carbon source. ATP  
 628 was measured by luciferase after one week of growth, with or without induction with  
 629 anhydrotetracycline (Atc) . Luminescence is normalized to the OD<sub>600</sub> of the culture. (D, E)  
 630 Survival of *M. tuberculosis* expressing *acs*, *ackA*, or *pta* under control of a tetracycline inducible  
 631 promoter. Cultures were grown in minimal media with (D) 2.5 mM acetate or (E) 0.01% glycerol

632 as the sole carbon source for 7 days. The cultures were left uninduced (Ctr) or induced with Atc.  
633 Cultures were then challenged with rifampicin (10 µg/mL) + streptomycin (10 µg/mL) for 7 days.  
634 CFU/mL were determined before antibiotic treatment and after 7 days of treatment.  $P < 0.05$ , \*,  
635  $P < 0.0001$ , \*\*\*\*. Data are representative of at least three biological replicates. Significance was  
636 determined by one-way anova with Tukey's post test.

637  
638  
639  
640  
641  
642  
643  
644  
645  
646  
647  
648  
649  
650  
651  
652  
653  
654  
655  
656  
657  
658

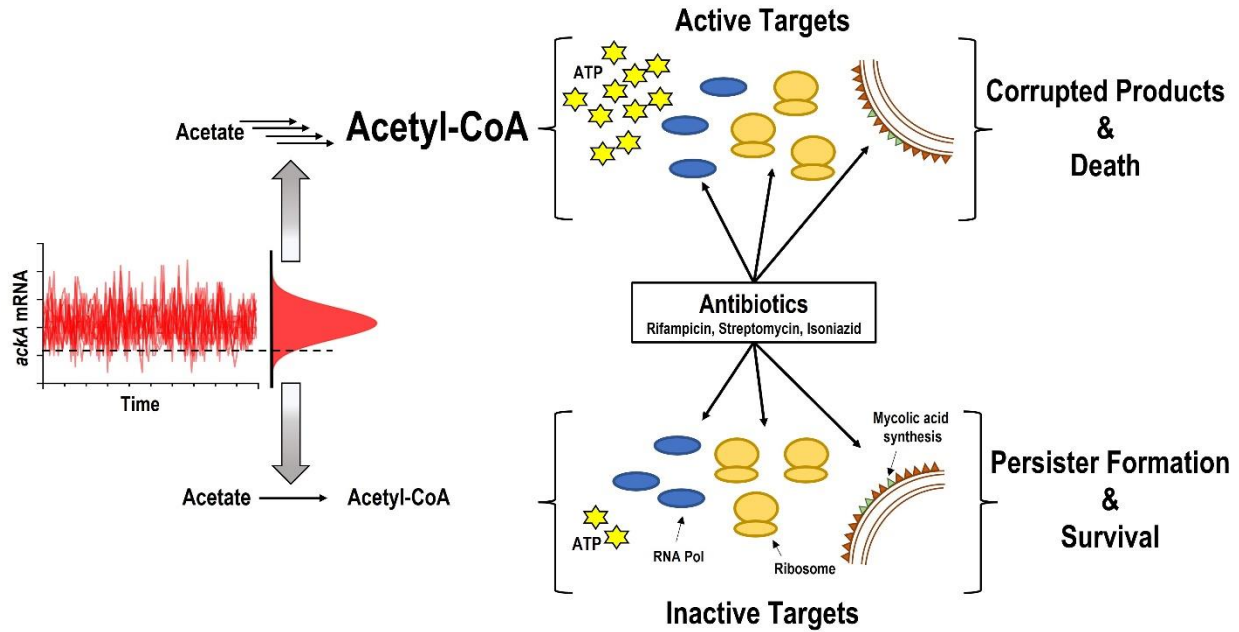

659  
660  
661  
662  
663  
664  
665  
666  
667  
668  
669  
670  
671  
672  
673  
674  
675  
676  
677  
678  
679  
680  
681  
682  
683

**Fig. 5: A model of persister cell formation**

When *M. tuberculosis* is grown in minimal media with acetate, the acetate kinase AckA represents a bottleneck in the energy-producing pathway. In the majority of cells, AckA is not limiting and allows for the efficient catabolism of acetate. This translates into higher levels of ATP, and active targets such as RNA polymerase, the ribosome, and mycolic acid synthesis. Antibiotics corrupt the targets resulting in cell death. Noise in transcription causes stochastic decreases in AckA. This leads to a decrease in ATP and inactive targets, creating a multidrug-tolerant persister cell.

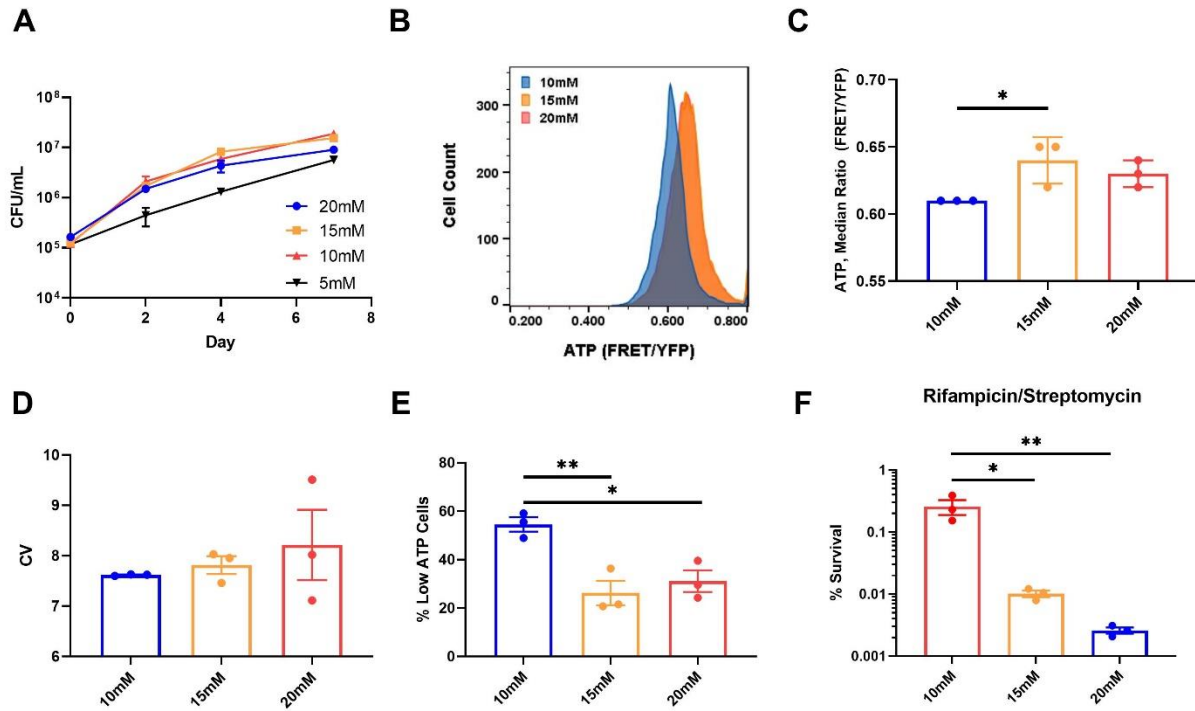

684  
685

**Figure S1: Limiting lactate increases noise in ATP levels, and persisters**

686 (A) Growth curve of *M. tuberculosis* in minimal media with varying concentrations of lactate as  
687 the sole carbon source. (B) Representative example of flow cytometry analysis of *M.*  
688 *tuberculosis* expressing ATeam1.03<sup>YEMK</sup>. *M. tuberculosis* was grown in minimal media with the  
689 indicated concentrations of lactate for one week before being analyzed. (C) Quantification of  
690 median FRET/YFP ratio generated by ATeam1.03<sup>YEMK</sup> in (B). (D) Quantification of co-efficient of  
691 variation (CV) of FRET/YFP ratio signal in (B). (E) Quantification of “Low ATP Cells” defined as  
692 events falling below a gate set at FRET/YFP ratio one standard deviation below median ratio in  
693 20 mM sample, the sample with the highest median FRET/YFP ratio. (F) Survival of *M.*  
694 *tuberculosis* grown at indicated concentrations of lactate after being challenged with rifampicin  
695 (10 µg/mL) + streptomycin (10 µg/mL) for seven days. P < 0.05, \*, P < 0.01, \*\*. Data are  
696 representative of at least three biological replicates. Significance was determined by one-way  
697 anova with Tukey’s post test.

698

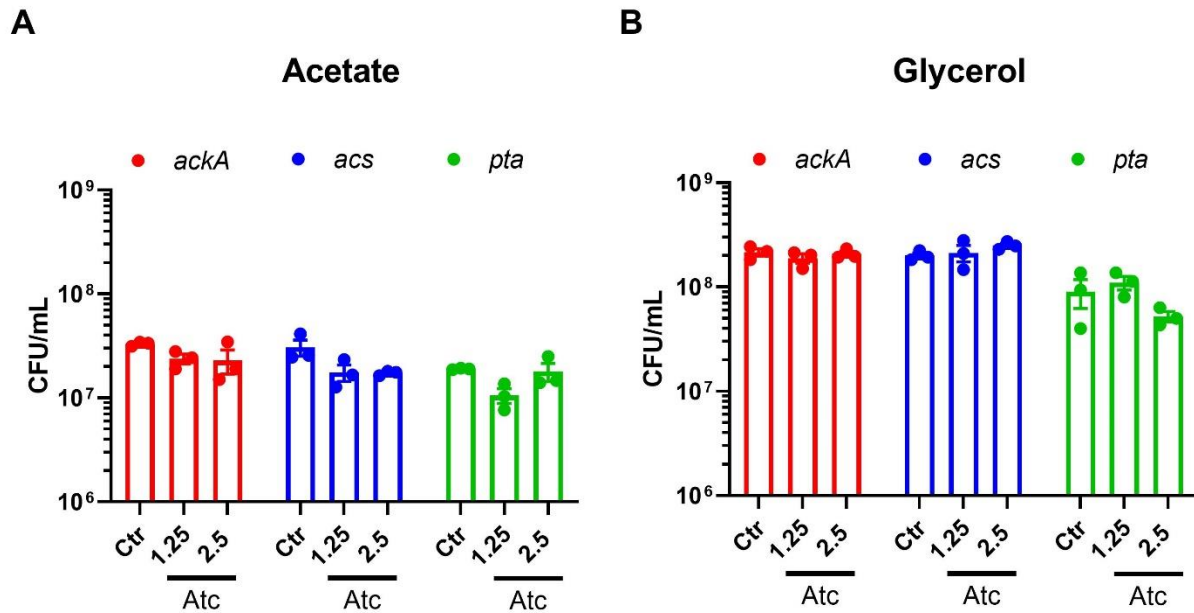

699

700 **Figure S2: Overexpression does not affect growth of *M. tuberculosis***

701 Initial CFU/mL of *M. tuberculosis* expressing *acs*, *ackA*, or *pta* under control of a tetracycline

702 inducible promoter. Cultures were grown in minimal media with (A) 2.5 mM acetate or (B) 0.01%

703 glycerol as the sole carbon source for 7 days. The cultures were left uninduced (Ctr) or induced

704 with Atc. Data are representative of three biological replicates.

705

706

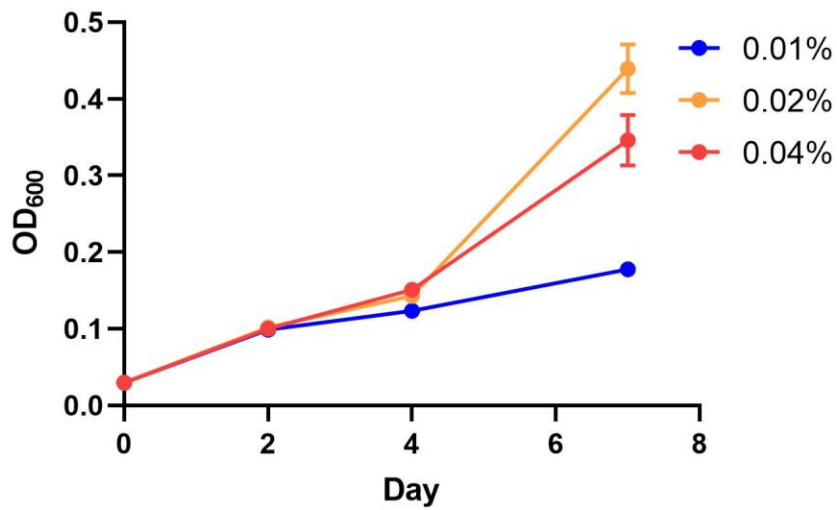

707

708 **Figure S3: Growth curve of *M. tuberculosis* in glycerol**

709 Growth of *M. tuberculosis* in minimal media with carrying concentrations of glycerol as the sole  
710 carbon source. Data are representative of three biological replicates.

711

712

713

714

715

716

717

718

719

720

721

722

723

724



725 **Table S1: Primers used in this study**

**Reverse transcription quantitative PCR (RT-qPCR) 5' → 3'**

oriE

Forward-GGTTTGTGGCCGGATCAAG

Reverse-TAGCAGAGCGAGGTATGTAG

FLuc

Forward-CAAAGTGCCTGCTAGTACC

Reverse-GTCTCAGTGAGCCCATATCC

ackA

Forward-GATGGCATATCCGCCGCTAC

Reverse-GTCAGGCCCATCGACGTTTC

acs

Forward-CAACGTCGCCTACAACCTGTG

Reverse-TTCGCGGCTTTGGATACCTC

pta

Forward-CCTGCGATTGCGGTTACCTG

Reverse-CAACGCGGTGTCGATCTTGC

**Overexpression analysis 5' → 3'**

ackA

Forward-GGGTTAATTAAGAAGGAGATATACATATGAGTAGCACCGTGCTGGTGATC

Reverse-TTTGATATCTCACGCTCGGCGTCCGCCAGCAC

acs

Forward-GGGTTAATTAAGAAGGAGATATAATGAGTGAGTCCACCCCGAAGTC

Reverse-AAAGATATCCTACTTGCGGCCCGGATCGCGTC

pta

Forward-GGGTTAATTAAGAAGGAGATATACATATGGCTGACTCCTCGGCGATCTAC

Reverse-GGCTTTAACTACTCATGGACGCCCTGCGCCTG

726
